# Supplementary material
Source: PubMed Central journal article supplement (PMC2764813)
Supplement: NIHMS150021-supplement-1_si_001.pdf [file NIHMS150021-supplement-1_si_001.pdf]

## SUPPORTING INFORMATION

### Exploring Molecular Mechanisms of Ligand Recognition by Opioid Receptors with Metadynamics

Davide Provasi, Andrea Bortolato, and Marta Filizola

#### Contents:

|                |   |
|----------------|---|
| Table S1.....  | 1 |
| Figure S1..... | 2 |
| Figure S2..... | 3 |
| Figure S3..... | 4 |

**TABLE S1.** Structural prediction of long intracellular loop regions of GPCRs with known crystal structure. The structural difference between IL2 and IL3 loop conformations predicted by fast *ab initio* loop prediction algorithms for globular proteins and corresponding regions in crystal structures is given in terms of C $\alpha$  RMSD ( $\text{\AA}$ ) values.

| <i>ab initio</i> loop prediction algorithm | C $\alpha$ RMSD ( $\text{\AA}$ ) |                             |                               |                               |                         |
|--------------------------------------------|----------------------------------|-----------------------------|-------------------------------|-------------------------------|-------------------------|
|                                            | Rhodopsin IL2 (13 residues)      | Rhodopsin IL3 (23 residues) | $\beta$ 2AR IL2 (12 residues) | $\beta$ 1AR IL2 (12 residues) | AA2AR IL2 (13 residues) |
|                                            | PDB ID                           | PDB ID                      | PDB ID                        | PDB ID                        | PDB ID                  |
|                                            | 1GZM                             | 1GZM                        | 2RH1                          | 2VT4                          | 3ELM                    |
| Modloop                                    | 12.0                             | 19.2                        | 7.9                           | 11.0                          | 4.8                     |
| Dope                                       | 8.6                              | 6.0                         | 9.6                           | 6.9                           | 6.9                     |
| Loopy                                      | 6.3                              | 9.0                         | 6.0                           | 4.0                           | 5.2                     |
| Plop                                       | 6.0                              | 10.3                        | 7.1                           | 4.4                           | 3.3                     |
| Rosetta                                    | 2.6                              | 3.9                         | 5.0                           | 3.3                           | 1.0                     |

Abbreviations: AA2AR, adenosine A2A receptor;  $\beta$ 1AR,  $\beta$ 1 adrenergic receptor;  $\beta$ 2AR,  $\beta$ 2-adrenergic receptor; GPCRs, G-protein coupled receptors; IL, intracellular loop; RMSD, root mean square deviation; PDB ID, Protein Data Bank IDentification;

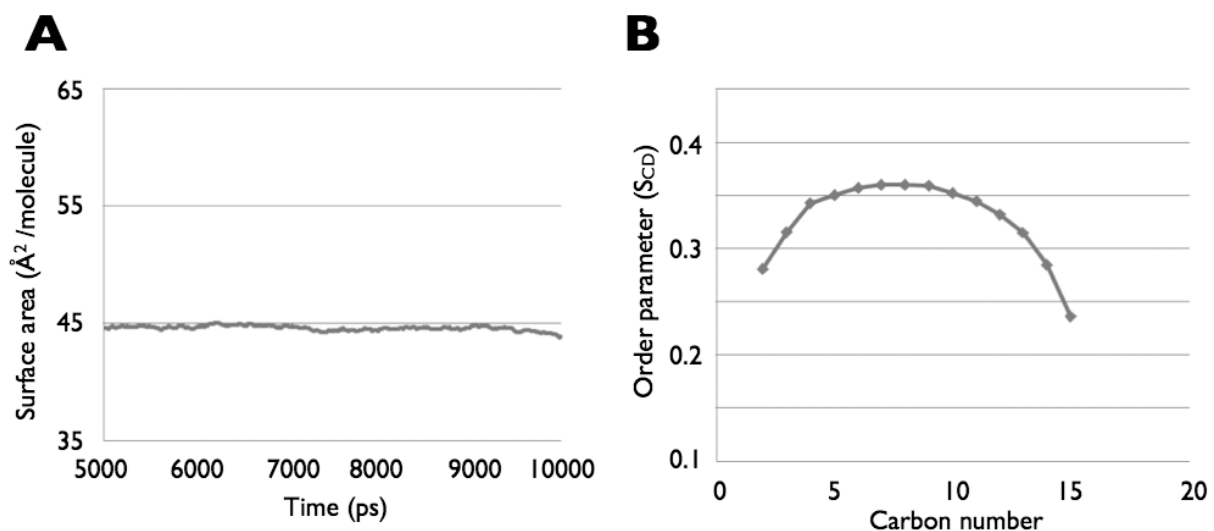

**FIGURE S1** Dynamic behavior of the DPPC-20% cholesterol membrane environment during the last 5 ns of 10 ns MD simulations expressed as (A) surface area per lipid in the  $xy$  plane, and (B) deuterium order parameter profile.

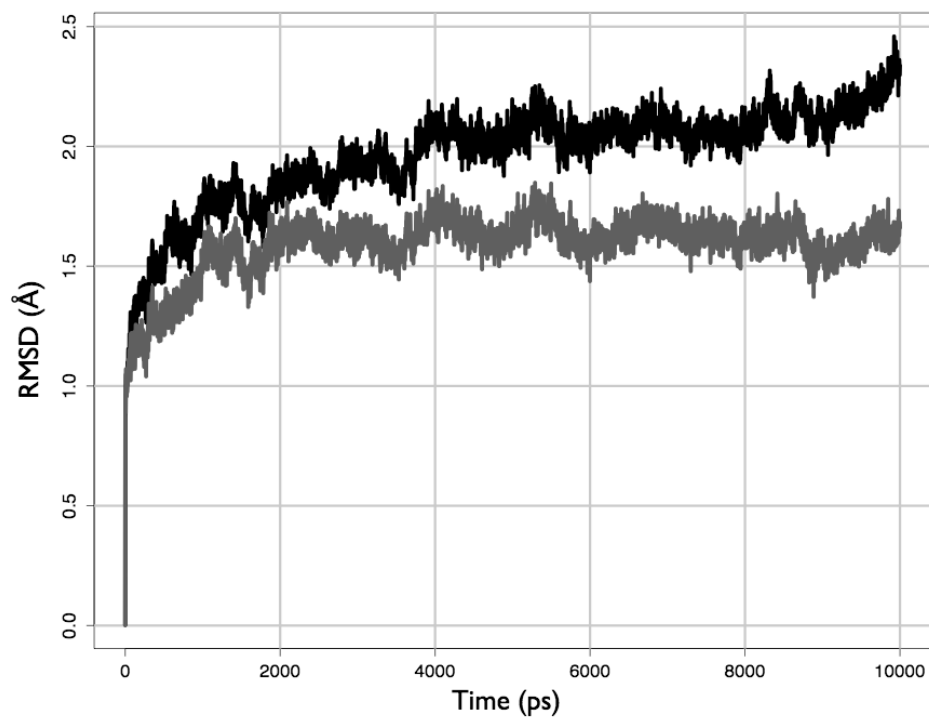

**FIGURE S2.** Time evolution of the backbone RMSD of human DOR (only TMs in grey and all atoms in black) during 10 ns unrestricted MD equilibration.

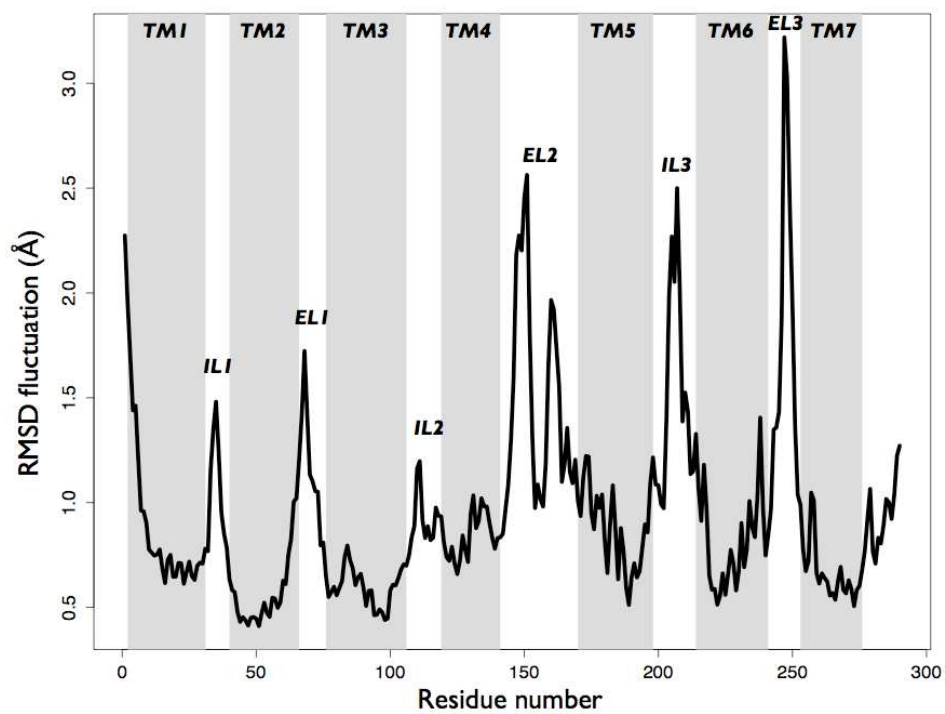

**FIGURE S3.** RMSD fluctuation per residue of human DOR during 10 ns unrestricted MD equilibration.
